# Supplementary material for: Retrospective analysis of the impact of dose delay and reduction on outcomes of colorectal cancer patients treated with FOLFIRI‑based treatment
Source: PeerJ. 2023 Sep 12;11:e15995. doi: 10.7717/peerj.15995 (PMC10503495; doi:10.7717/peerj.15995)
Supplement: Supplemental Information 1 [file peerj-11-15995-s001.xlsx]

## Sheet: Sheet1
Patient number	PFS（progression-free survival，0: PFS;1:non-PFS;9:unknown）	The progress of time	Therapeutic effects	Treatment line	Gender	Age	Admission date	Tumor location	Metastasis site	NRS2002评分	First-line chemotherapy	live.time	death.time	ras（0:wild, 1:mutation, 9:unknown）	braf（0:wild, 1:mutation, 9:unknown）	HER2（0:negative, 1:positive 1+, 2:positive 2+, 9:unknown）	MMR(9:unknown)	MSI(9:unknown)	Whether to use bevacizumab(0: No, 1:Yes)	Whether to use cetuximab(0: No, 1:Yes)	Radiotherapy(0: No, 1:Yes)	tumor location	CRC Surgery（0:No, 1:Yes）	emergency operation（0:No, 1:Yes）	Liver Surgery（0:No, 1:Yes）	Histological grade (1: highly differentiated; 2: intermediate differentiation; 3: Low differentiation; 9: unknown)	Liver metastic（0:No, 1:Yes）	Number of metastatic organs	Chemotherapy continuity(0: continuous, 1:discontinuous)	number of Comorbidity	ECOG	Survivalmonths	plt.low (0:normal, 1:Abnormal)	wbc.low(0:normal, 1:Abnormal)	n.low(0:normal, 1:Abnormal)	hb.low(0:normal, 1:Abnormal)	alt.high(0:normal, 1:Abnormal)	ast.high	tbil.high(0:normal, 1:Abnormal)	pfsmonths	Height（cm）	Weight（kg）	Date of the first cycle chemotherapy	The dose of irinotecan in the first cycle chemotherapy（mg）	The dose of 5-Fu in the first cycle chemotherapy（g）	Date of the second cycle chemotherapy	The dose of irinotecan in the second cycle chemotherapy（mg）	The dose of 5-Fu in the second cycle chemotherapy（g）	Date of the third cycle chemotherapy
1	0		SD	1	Male	59	2022-9-12	crc	peritoneum	0	FOLFIRI	2022-11-04		0	0	9	dmmr	MSI-H	0	1	0	letf-side CRC	1	0	0	3	0	2	0	0	0	1.8	0	0	0	0	0	0	0	1.8	160	57	2022-9-12	240	4.2	2022-10-1	240	4.2	2022-10-18
2	0		SD	1	Male	51	2022-8-5	crc	unknown		FOLFIRI	2022-10-26		0	0	9	pMMR	MSS	0	1	0	letf-side CRC	1	1	0	3	0	3	1	0	1	3.2	0	0	0	1	0	0	0	2.7	160	55	2022-8-5	240	4.1	2022-9-20	240	4.1	2022-10-10
3	9		SD	1	Male	55	2022-8-17	crc	unknown		FOLFIRI	2022-11-02		0	0	9	pMMR	MSS	0	1	0	letf-side CRC	1	0	0	2	0	1	0	1	0	26.4	1	0	0	1	0	0	0	2.6	165	75	2022-8-17	280	4.6	2022-9-3	280	4.6	2022-9-18
4	0		unknown	1	Male	67	2022-6-20	crc	pleura	4	FOLFIRI	2022-07-02		1	0	0	pMMR	MSS	1	0	0	letf-side CRC	1	0	0	3	1	3	0	2	1	0.5	1	0	0	0	0	0	0	0.4	178	90	2022-6-20	300	4.7	2022-7-3	300	4.7	2022-07-17
5	0		PR	1	Female	68	2022-5-13	crc	live+peritoneum	1	FOLFIRI	2022-10-06		1	0	0	pMMR	MSS	1	0	0	letf-side CRC	0	0	0	9	1	2	0	0	0	4.3	0	1	0	1	0	0	0	4.9	162	68	2022-5-13	280	4.5	2022-5-30	280	4.5	2022-6-17
6	1	2022/9/13	SD	1	Male	69	2022-5-12	crc	unknown	1	FOLFIRI	2022-08-14		0	0	0	pMMR	MSS	0	1	1	letf-side CRC	1	0	0	2	0	2	0	0	0	30.9	0	1	0	0	0	0	0	3.1	160	52	2022-5-12	240	3.5	2022-5-26	240	3.5	2022-6-11
7	9		SD	1	Male	69	2022-4-5	crc	unknown	3	FOLFIRI	2022-09-05		1	0	0	pMMR	MSS	1	0	1	letf-side CRC	1	0	0	3	1	4	1	1	1	5.2	0	0	0	1	0	0	0	5.1	170	70	2022-4-5	240	4	2022-4-30	240	4	2022-6-1
8	0		PR	1	Female	71	2022-4-17	crc	live+other	1	FOLFIRI	2022-09-26		0	0	1	pMMR	MSS	0	1	0	letf-side CRC	1	0	1	2	1	1	0	0	0	5.7	0	0	0	0	0	0	0	5.4	157	70	2022-4-17	240	4.2	2022-5-6	240	4.2	2022-5-23
9	0		PR	1	Male	67	2022-3-19	crc	live	1	FOLFIRI	2022-10-26		0	0	1	pMMR	MSS	0	1	0	letf-side CRC	1	0	1	2	1	1	1	0	0	7.6	0	0	0	0	0	0	0	7.4	160	55	2022-3-19	240	4.1	2022-4-5	240	4.1	2022-4-19
10	0		SD	1	Female	55	2022-3-17	crc	pleura	3	FOLFIRI	2022-11-02		0	0	0	pMMR	MSS	0	1	1	letf-side CRC	1	0	0	2	0	1	0	1	1	0	0	1	0	0	0	0	0	7.7	160	44	2022-3-17	200	3.5	2022-4-11	200	3.5	2022-5-11
11	0		PR	1	Female	53	2022-3-14	crc	unknown	0	FOLFIRI	2022-10-05		0	0	0	pMMR	MSS	1	0	0	letf-side CRC	1	0	0	2	1	2	0	0	1	7.1	0	0	0	0	0	0	0	6.8	150	50	2022-3-14	200	3.75	2022-3-28	200	3.75	2022-4-12
12	1	2022/5/14	PD	1	Male	66	2022-3-11	crc	unknown	1	FOLFIRI	2022-08-08		0	0	2	pMMR	MSS	0	1	0	letf-side CRC	1	0	0	2	1	2	0	0	2	27	0	1	1	1	0	0	0	5	176	60	2022-3-11	280	4.6	2022-3-29	280	4.6	2022-4-26
13	0		SD	1	Female	75	2022-2-21	crc	unknown	5	FOLFIRI	2022-07-31		1	0	0	pMMR	MSI-L	1	0	0	letf-side CRC	1	0	0	3	1	2	0	1	2	5.5	0	0	0	1	0	0	0	2.3	150	50	2022-2-21	200	3.45	2022-3-14	200	3.45	2022-4-3
14	0		unknown	1	Male	57	2022-2-16	crc	lung+lymph	2	FOLFIRI	2022-03-25		1	0	9	pMMR	MSS	1	0	0	letf-side CRC	1	0	0	2	0	1	0	2	0	1.4	0	0	0	1	0	0	0	1.8	155	55	2022-2-16	240	4.1	2022-3-9	240	4.1	2022-3-25
15	0		PR	1	Male	66	2021-9-21	crc	live+lymph	1	FOLFIRI	2022-10-17		1	0	0	pMMR	MSS	1	0	0	letf-side CRC	1	0	1	2	1	2	0	0	0	13.2	0	0	0	0	0	0	0	3.8	173	66	2021-9-21	280	5	2021-10-11	280	5	2021-11-3
16	0		unknown	1	Female	69	2021-8-9	crc	unknown	1	FOLFIRI	2022-03-21		0	0	1	pMMR	MSS	0	1	0	letf-side CRC	1	0	0	3	0	1	0	1	0	7.5	0	1	0	0	0	0	0	6.7	153	60.5	2021-8-9	220	4.2	2021-8-25	220	4.2	2021-9-12
17	9		SD	1	Female	72	2021-8-26	crc	live	1	FOLFIRI	2021-10-08		0	0	0	pMMR	MSS	0	1	1	letf-side CRC	1	0	1	2	1	1	0	0	1	18.8	0	0	0	1	0	0	0	1.4	155	42	2021-8-26	195	2.975	2021-9-16	220	3.5	2021-10-9
18	0		SD	1	Male	68	2021-8-24	crc	lymph+peritoneum	4	FOLFIRI	2022-05-04		9	9	9	9	9	1	0	0	right-side CRC	0	0	0	9	0	1	0	0	0	8.7	0	0	0	0	0	0	0	6.8	165	65	2021-8-24	240	4.9	2021-9-13	240	4.9	2021-10-2
19	1	2022/3/1	PR	1	Male	60	2021-7-5	crc	unknown	3	FOLFIRI	2022-11-04		1	0	0	pMMR	MSS	1	0	0	letf-side CRC	1	0	1	2	1	2	0	0	0	16.4	0	0	0	0	0	0	1	16.2	177	70	2021-7-5	300	4.5	2021-7-28	300	4.5	2021-8-21
20	0		unknown	1	Male	52	2021-7-5	crc	unknown	1	FOLFIRI	2022-06-06		9	9	9	9	9	0	0	0	letf-side CRC	1	0	0	2	0	0	0	1	0	7.4	1	0	0	0	0	0	0	8.3	173	75	2021-7-5	280	4.9	2021-11-24	280	4.9	2022-1-9
21	1	2022/8/19	SD	1	Male	70	2021-7-31	crc	lymph+peritoneum	2	FOLFIRI	2022-10-16		1	0	9	pMMR	MSS	0	1	0	letf-side CRC	1	0	0	3	0	1	1	0	0	7.7	0	0	0	0	0	0	0	14.7	160	61	2021-7-31	240	4.1	2021-8-21	240	4.1	2021-9-20
22	1	2022-03-21 08:06:00 UTC	PR	1	Male	74	2021-7-31	crc	live	5	FOLFIRI	2022-08-22		1	0	0	pMMR	MSS	1	0	0	right-side CRC	1	1	0	2	1	1	0	0	0	13.1	0	0	0	1	0	0	0	7.8	176.6	71	2021-7-31	320	4.9	2021-9-19	320	4.9	2021-10-15
23	0		PR	1	Male	76	2021-7-15	crc	lymph	2	FOLFIRI	2022-03-25		0	0	0	pMMR	MSS	1	0	0	right-side CRC	1	0	0	3	0	1	0	1	0	8.5	0	0	0	0	0	0	0	8.4	165	59	2021-7-15	280	4.2	2021-8-3	280	4.2	2021-8-20
24	1	2021/12/13	PR	1	Female	67	2021-7-13	crc	unknown		FOLFIRI	2022-01-02		1	0	1	pMMR	MSS	1	0	0	letf-side CRC	1	0	0	2	0	3	0	0	0	6.1	0	0	0	0	0	0	0	5.8	150	70	2021-7-13	290	4.5	2021-8-3	290	4.5	2021-8-20
25	0		PR	1	Male	66	2021-6-8	crc	live	0	FOLFIRI	2022-03-29		1	0	9	9	9	1	0	0	letf-side CRC	0	0	0	3	1	1	0	1	1	10.1	0	0	0	0	0	0	0	10.4	180	95	2021-6-8	380	5.6	2021-6-26	380	5.6	2021-7-14
26	0		SD	1	Female	38	2021-6-29	crc	lung	1	FOLFIRI	2022-10-17		1	0	0	pMMR	MSS	1	0	0	letf-side CRC	1	0	0	2	0	1	0	1	0	38.1	0	0	0	0	0	0	0	10	155	60	2021-6-29	240	4.2	2021-7-12	240	4.2	2021-7-27
27	1	2022-03-23 00:00:00 UTC	PR	1	Male	64	2021-6-26	crc	live	3	FOLFIRI	2022-10-24		0	0	1	pMMR	MSS	1	0	0	right-side CRC	1	0	0	2	1	1	1	1	0	16.3	0	0	0	1	0	0	0	9	165	60	2021-6-26	220	4.2	2021-7-24	220	4.2	2021-8-9
28	9		SD	1	Male	52	2021-6-15	crc	unknown	4	FOLFIRI	2022-01-24		0	0	0	pMMR	MSS	0	1	0	letf-side CRC	1	0	0	3	0	1	0	0	0	10.4	0	1	0	0	1	0	0	7.4	165	64	2021-6-15	310	4.9	2021-7-7	310	4.9	2021-7-25
29	0		PR	1	Male	73	2021-5-25	crc	unknown	1	FOLFIRI	2022-03-25		9	9	1	pMMR	MSS	0	0	1	letf-side CRC	1	0	0	3	0	0	0	1	1	9.4	0	0	0	1	0	0	0	10.1	164	53	2021-5-25	220	4.2	2021-6-18	220	4.2	2021-7-14
30	0		unknown	1	Male	69	2021-5-15	crc	live	1	FOLFIRI	2022-03-25		0	0	9	pMMR	MSS	0	1	0	letf-side CRC	1	0	1	2	1	1	0	3	1	10.5	0	0	0	0	0	0	0	10.5	173	88	2021-5-15	320	5.8	2021-6-2	320	5.8	2021-06-16
31	1	2022/1/19	PR	1	Female	52	2021-2-28	crc	unknown	2	FOLFIRI	2022-05-08		1	0	9	pMMR	MSS	1	0	0	letf-side CRC	1	0	0	9	0	1	0	0	0	14.6	1	0	0	1	0	0	0	14.5	154	60	2021-2-28	280	4.5	2021-3-18	280	4.5	2021-4-2
32	1	2021-11-09 14:43:00 UTC	PR	1	Male	67	2021-1-30	crc	lymph	1	FOLFIRI	2022-10-21		0	0	0	pMMR	MSS	0	1	0	letf-side CRC	1	0	0	3	0	2	0	1	0	21.3	0	0	0	1	0	0	0	9.4	160	55	2021-1-30	240	4.2	2021-2-17	240	4.2	2021-3-8
33	1	2022-03-10 14:47:00 UTC	PR	1	Male	66	2021-1-29	crc	live+lung+lymph	1	FOLFIRI	2022-07-20		0	0	0	pMMR	MSS	0	1	0	letf-side CRC	1	0	1	2	1	3	1	1	0	18	0	1	0	0	0	0	0	13.5	170	65	2021-1-29	240	4.35	2021-2-23	240	4.35	2021-3-20
34	0		unknown	1	Male	55	2021-12-24	crc	unknown	1	FOLFIRI	2022-07-16		9	9	9	pMMR	MSS	0	0	1	letf-side CRC	1	0	0	2	0	0	1	0	0	6.9	0	1	0	1	0	0	0	2.5	168	65	2021-12-24	300	4.9	2022-1-9	300	4.9	2022-1-24
35	0		SD	1	Male	37	2021-12-2	crc	unknown	2	FOLFIRI	2022-03-30		0	0	9	pMMR	MSS	0	1	0	letf-side CRC	0	0	0	9	0	3	1	0	1	4.1	0	0	0	0	0	0	0	3.9	160	45	2021-12-2	200	3.5	2021-12-22	200	3.5	2022-2-17
36	0		SD	1	Male	65	2021-12-2	crc	lymph	1	FOLFIRI	2022-06-03		1	0	0	pMMR	MSS	1	0	0	letf-side CRC	0	0	0	9	0	1	0	2	0	6.4	0	0	0	0	0	0	0	4.9	175	65	2021-12-2	280	4.55	2021-12-19	280	4.55	2022-1-7
37	9		unknown	1	Male	72	2021-12-10	crc	live+lung	2	FOLFIRI	2022-01-04		1	0	0	pMMR	MSS	1	0	0	letf-side CRC	0	0	1	3	1	2	0	1	0	0.9	0	0	0	0	0	0	0	0.8	177	85	2021-12-10	280	4.7	2022-1-7	280	4.7	2022-01-21
38	0		PR	1	Female	67	2021-12-10	crc	lung+lymph	0	FOLFIRI	2022-08-16		0	0	0	pMMR	MSS	0	1	0	letf-side CRC	1	0	0	2	0	1	0	1	0	6.3	0	1	0	0	0	0	0	4.6	156	64.4	2021-12-10	240	3.75	2021-12-28	240	3.75	2022-1-18
39	0		PR	1	Male	72	2021-11-8	crc	live+lung	2	FOLFIRI	2022-10-18		1	0	0	pMMR	MSS	1	0	0	letf-side CRC	1	0	0	2	1	2	0	1	0	11.6	0	0	0	0	0	0	0	5.7	170	70	2021-11-8	270	0.7	2021-11-27	270	4.7	2021-12-13
40	0		SD	1	Female	58	2021-11-8	crc	unknown	1	FOLFIRI	2022-07-17		0	0	0	pMMR	MSS	0	1	1	letf-side CRC	1	0	0	2	0	2	0	0	0	10.4	1	1	0	1	0	0	0	4.3	150	40	2021-11-8	240	4.2	2021-11-30	240	4.2	2021-12-17
41	1	2022-03-21 08:05:00 UTC	PR	1	Male	71	2021-1-17	crc	live	2	FOLFIRI	2022-06-06		0	0	2	pMMR	MSS	0	1	0	letf-side CRC	1	0	0	2	1	1	1	0	1	17.1	0	0	0	0	0	0	0	14.3	160	58	2021-1-17	200	4.2	2021-2-5	200	4.2	2021-2-24
42	1	2022/12/9	PR	1	Female	55	2021-11-7	crc	live	1	FOLFIRI	2022-08-11		0	0	2	pMMR	MSS	0	1	0	letf-side CRC	1	0	1	2	1	1	0	0	0	8.4	0	1	0	0	0	0	0	9.2	166	49.5	2021-11-7	240	4.5	2021-12-25	240	4.5	2022-1-20
43	0		SD	1	Male	58	2021-11-7	crc	unknown	1	FOLFIRI	2022-02-08		0	0	1	pMMR	MSS	0	0	0	letf-side CRC	1	0	0	2	0	0	0	1	1	3.6	0	0	0	0	0	0	0	4	173	67	2021-11-7	240	4.9	2021-11-27	240	4.9	2021-12-18
44	0		SD	1	Female	48	2021-11-30	crc	live	1	FOLFIRI	2022-04-02		1	0	9	pMMR	MSS	1	0	0	letf-side CRC	0	0	0	2	1	2	0	0	0	4.3	0	1	0	0	1	1	0	3.6	165	65	2021-11-30	260	4.55	2021-12-16	260	4.55	2022-1-5
45	9		unknown	1	Male	70	2021-11-15	crc	lung	1	FOLFIRI	2021-11-30		1	0	9	pMMR	MSS	1	0	0	letf-side CRC	0	0	0	9	0	1	0	0	2	0.9	0	1	0	1	0	0	0	2	168	60	2021-11-15	280	4.55	2021-12-1	280	4.55	2021-12-15
46	1	2022-03-19 09:02:00 UTC	SD	1	Male	64	2021-10-4	crc	unknown	1	FOLFIRI	2022-07-22		0	0	0	pMMR	MSS	0	1	0	letf-side CRC	1	0	0	2	0	0	0	0	0	7.6	0	0	0	1	0	0	0	5.5	165	60	2021-10-4	280	4.2	2021-10-23	280	4.2	2021-11-29
47	1	2022-03-18 12:45:00 UTC	SD	1	Male	71	2021-10-16	crc	live	2	FOLFIRI	2022-08-26		1	0	1	pMMR	MSS	1	0	0	letf-side CRC	1	0	0	2	1	1	0	1	0	10.5	0	0	0	0	1	1	0	5.1	161	60	2021-10-16	240	3.5	2021-11-6	240	3.5	2021-11-21
48	0		PR	1	Male	66	2021-10-13	crc	live+other	1	FOLFIRI	2022-01-03		0	0	9	9	9	0	1	0	letf-side CRC	1	0	0	2	0	0	0	0	0	3.2	1	0	0	0	0	0	0	2.7	170	79	2021-10-13	320	4.9	2021-11-2	320	4.9	2021-11-23
49	1	2020/12/18	PD	1	Male	52	2020-9-28	crc	unknown	6	FOLFIRI		2021-10-16	0	0	2	pMMR	MSS	1	0	0	right-side CRC	1	0	0	2	0	2	0	0	0	10.3	0	0	0	0	0	0	0	12.8	170	65	2020-9-28	280	4.2	2020-10-17	280	4.2	2020-11-6
50	1	2022/3/1	SD	1	Female	51	2020-8-4	crc	unknown		FOLFIRI	2022-10-25		0	0	0	pMMR	MSS	0	1	0	letf-side CRC	1	0	0	3	0	1	0	0	0	26.5	0	1	0	0	1	0	0	27.1	160	65	2020-8-4	240	4.1	2020-8-22	240	4.1	2020-9-11
51	1	2021-09-24 00:00:00 UTC	PD	1	Male	77	2020-8-27	crc	lung	1	FOLFIRI		2021-11-22	0	0	0	pMMR	MSS	1	0	0	right-side CRC	1	0	0	3	0	1	0	0	0	15.7	0	0	0	0	0	0	0	13.1	175	64	2020-8-27	280	4.55	2020-9-18	240	3.9	2020-10-02
52	1	2021-03-29 13:59:00 UTC	PD	1	Male	70	2020-8-14	crc	lung	3	FOLFIRI	2021-01-08		0	0	0	pMMR	MSS	0	1	0	letf-side CRC	1	0	0	9	0	1	0	0	0	5.1	0	0	0	0	0	0	0	7.6	175	60	2020-8-14	240	4.2	2020-8-30	240	4.2	2020-9-18
53	1	2021-03-09 13:54:00 UTC	SD	1	Female	52	2020-7-8	crc	live+lymph+peritoneum	2	FOLFIRI		2021-08-22	0	1	0	pMMR	MSS	1	0	0	letf-side CRC	1	0	0	2	1	2	0	0	0	14	0	0	0	0	0	0	0	8.1	170	59	2020-7-8	200	3.75	2020-7-24	200	3.75	2020-8-9
54	1	2021-04-23 00:00:00 UTC	PR	1	Female	48	2020-7-8	crc	live+peritoneum	1	FOLFIRI	2022-09-13		0	0	0	pMMR	MSS	0	1	0	letf-side CRC	1	0	1	2	1	2	0	1	0	26.7	0	0	0	0	1	1	0	9.6	158	59	2020-7-8	240	4	2020-7-23	240	4	2020-8-6
55	1	2021-05-01 13:13:00 UTC	PR	1	Male	65	2020-7-10	crc	lung	1	FOLFIRI		2022-03-15	1	0	9	9	9	1	0	0	letf-side CRC	0	0	0	9	1	3	0	1	0	20.7	0	0	0	0	0	0	0	9.8	160	55	2020-7-10	240	3.85	2020-7-29	240	3.85	2020-8-17
56	1	2020/12/21	PR	1	Male	66	2020-4-27	crc	live		FOLFIRI		2022-03-14	0	0	0	pMMR	MSS	0	1	0	letf-side CRC	1	0	1	9	1	1	0	2	1	21.4	0	0	0	0	0	0	0	22.9	165	71	2020-4-27	270	4.35	2020-5-13	270	4.35	2020-5-28
57	1	2021/2/3	PR	1	Male	64	2020-4-22	crc	unknown	0	FOLFIRI	2022-08-22		0	0	9	pMMR	MSS	1	0	0	letf-side CRC	1	0	0	2	0	1	0	0	0	28.7	0	0	0	0	1	0	0	28.4	162	63	2020-4-22	240	4.9	2020-5-8	240	4.9	2020-5-24
58	1	2020-11-30 15:26:00 UTC	PR	1	Male	57	2020-4-13	crc	live+lung	1	FOLFIRI		2020-12-15	0	0	0	pMMR	MSS	0	1	0	letf-side CRC	1	0	0	2	1	2	0	1	0	7.3	0	0	0	0	0	0	0	7.7	172	75	2020-4-13	280	4.75	2020-4-27	280	4.75	2020-5-13
59	1	2022-02-11 08:01:00 UTC	PR	1	Male	68	2020-3-23	crc	live	1	FOLFIRI		2022-10-21	0	0	9	9	9	1	0	1	letf-side CRC	0	0	0	2	1	1	0	1	0	31.6	0	0	0	0	1	1	0	23	170	71	2020-3-23	270	4.2	2020-4-10	270	4.2	2020-5-1
60	1	2020/12/29	SD	1	Female	65	2020-3-18	crc	lung	0	FOLFIRI	2022-10-14		1	0	9	pMMR	MSS	1	0	0	letf-side CRC	1	0	0	2	0	1	0	1	0	31.4	0	0	0	0	0	0	0	31.3	156	66	2020-3-18	270	4.2	2020-4-5	270	4.2	2020-4-29
61	1	2021-05-23 07:26:00 UTC	SD	1	Male	55	2020-3-13	crc	lung	0	FOLFIRI	2022-09-13		1	0	9	9	9	1	0	1	letf-side CRC	1	0	0	2	0	1	0	0	0	30.6	0	0	0	0	0	0	0	14.5	170	68.5	2020-3-13	270	4.2	2020-4-1	270	4.2	2020-4-20
62	1	2020-03-24 10:12:00 UTC	unknown	1	Male	70	2020-2-8	crc	live	2	FOLFIRI		2020-07-15	1	0	9	pMMR	MSS	1	0	0	letf-side CRC	0	0	0	9	1	1	0	0	1	5.4	0	0	0	0	0	0	0	1.5	170	65	2020-2-8	280	4.2	2020-2-26	280	4.2	2020-03-11
63	1	2020/8/1	SD	1	Female	62	2020-1-9	crc	lymph	1	FOLFIRI	2022-06-16		0	0	1	pMMR	MSS	0	1	0	letf-side CRC	1	0	0	3	0	1	0	0	0	29.7	0	0	0	1	0	0	0	29.6	158	48	2020-1-9	240	3.8	2020-1-21	240	3.8	2020-2-4
64	1	2021-08-21 08:03:00 UTC	PR	1	Female	75	2020-12-31	crc	unknown	2	FOLFIRI		2021-07-27	9	9	0	dMMR	MSI-H	1	0	0	right-side CRC	1	0	0	3	0	1	0	1	0	7	0	0	0	0	0	0	0	7.8	157	60	2020-12-31	240	3.85	2021-1-19	240	3.85	2021-2-7
65	1	2021-08-17 10:55:00 UTC	PD	1	Female	79	2020-12-15	crc	live	2	FOLFIRI	2022-01-13		1	0	0	pMMR	MSS	0	0	0	right-side CRC	1	0	0	3	1	4	0	1	1	13.2	0	0	0	1	0	0	0	8.2	156	60	2020-12-15	240	3.85	2021-1-3	240	3.85	2021-01-18
66	0		PR	1	Male	64	2020-12-14	crc	live	1	FOLFIRI	2022-08-09		1	0	0	pMMR	MSS	1	0	0	right-side CRC	1	0	0	2	1	2	0	0	0	20.4	0	0	0	0	0	0	0	16.4	160	58	2020-12-14	240	4.2	2020-12-30	240	4.2	2021-1-14
67	1	2021-07-18 11:37:00 UTC	PD	1	Male	58	2020-1-21	crc	live	1	FOLFIRI		2022-05-04	1	0	9	pMMR	MSS	0	0	1	letf-side CRC	1	0	1	2	1	2	0	0	2	28	0	0	0	1	1	0	0	18.1	164	76	2020-1-21	320	4.7	2020-2-9	320	4.7	2020-2-26
68	1	2021-12-11 10:12:00 UTC	SD	1	Female	67	2020-11-5	crc	peritoneum+ovary	1	FOLFIRI	2022-07-31		1	0	0	pMMR	MSS	1	0	0	letf-side CRC	1	0	0	3	0	1	0	0	0	21.2	0	0	0	0	0	0	0	13.4	158	63	2020-11-5	220	4.2	2020-11-23	220	4.2	2020-12-12
69	1	2021/6/18	SD	1	Male	59	2020-11-20	crc	live	1	FOLFIRI	2021-07-13		1	0	9	pMMR	MSS	1	0	0	letf-side CRC	1	0	0	3	1	1	0	1	0	5.8	1	0	0	0	0	0	0	7.8	168	65	2020-11-20	320	5.25	2020-12-8	320	5.25	2020-12-23
70	1	2020-08-20 08:23:00 UTC	SD	1	Female	53	2019-9-4	crc	lung	1	FOLFIRI	2022-09-01		1	0	9	pMMR	9	1	0	0	letf-side CRC	1	0	0	2	0	1	0	0	0	36.4	0	0	0	0	0	0	0	11.7	160	45	2019-9-4	200	3.5	2019-9-27	200	3.5	2019-10-11
71	0		SD	1	Male	44	2019-9-30	crc	lung	1	FOLFIRI	2022-03-28		0	0	2	pMMR	MSS	0	0	1	letf-side CRC	1	0	0	2	0	1	0	0	0	30.8	0	0	0	0	0	0	0	30.3	170	69	2019-9-30	280	4.7	2019-10-17	280	4.7	2019-11-15
72	1	2020-12-23 10:01:00 UTC	PR	1	Female	47	2019-9-20	crc	lung+adrenal gland	0	FOLFIRI	2022-07-27		0	0	9	pMMR	MSS	0	1	0	letf-side CRC	1	0	0	2	0	2	0	0	0	34.8	0	1	0	1	0	0	0	15.3	164	57	2019-9-20	240	4.35	2019-10-6	240	4.35	2019-10-20
73	9		unknown	1	Male	68	2019-8-9	crc	peritoneum	3	FOLFIRI		2020-04-01	0	1	0	pMMR	MSS	1	0	0	right-side CRC	1	0	0	3	0	1	0	0	0	7.9	0	0	0	0	1	0	0	7.9	175	70	2019-8-9	280	4.95	2019-08-23	280	4.95	2019-09-08
74	1	2020/4/22	PR	1	Male	53	2019-8-28	crc	live	1	FOLFIRI	2020-10-27		1	0	0	pMMR	MSS	1	0	0	letf-side CRC	1	0	1	2	1	1	0	0	1	5.2	0	0	0	0	0	0	0	14.2	175	68	2019-8-28	280	4.5	2019-9-12	280	4.5	2019-9-29
75	0		unknown	1	Female	45	2019-8-2	crc	lung+bone	1	FOLFIRI	2020-12-18		1	0	9	9	9	1	0	0	letf-side CRC	0	0	0	9	0	2	0	0	0	16.9	0	0	0	0	1	0	0	16.8	161	53	2019-8-2	240	4.4	2019-8-19	240	4.2	2019-10-1
76	1	2019-12-12 15:59:00 UTC	SD	1	Female	61	2019-7-1	crc	peritoneum	1	FOLFIRI	2022-03-04		0	0	9	9	9	0	1	0	letf-side CRC	1	0	0	2	0	1	0	0	0	32.9	0	1	0	0	1	0	0	5.5	155	60	2019-7-1	220	4	2019-7-20	220	4	2019-8-8
77	1	2020-01-18 00:00:00 UTC	unknown	1	Male	64	2019-6-5	crc	unknown	1	FOLFIRI		2020-06-15	0	0	9	9	9	0	1	0	letf-side CRC	1	0	0	3	0	1	0	0	0	13.2	0	0	0	0	0	0	0	7.6	163	66	2019-6-5	280	4.2	2019-6-21	280	4.2	2019-8-30
78	1	2020/5/23	PR	1	Female	45	2019-6-4	crc	live+lung	1	FOLFIRI	2022-04-01		0	0	0	pMMR	MSS	0	1	0	letf-side CRC	1	0	1	2	1	1	1	0	0	34.9	0	1	0	1	1	1	1	34.4	160	54	2019-6-4	240	4.1	2019-6-23	240	4.1	2019-7-15
79	1	2020-08-18 14:20:00 UTC	SD	1	Female	72	2019-6-20	crc	lung+peritoneum	2	FOLFIRI	2022-10-09		1	0	0	pMMR	MSS	1	0	0	right-side CRC	1	0	0	3	0	2	0	1	0	40.4	0	0	0	1	0	0	0	14.2	145	50	2019-6-20	200	3.5	2019-7-6	200	3.5	2019-7-23
80	1	2020/5/30	SD	1	Male	73	2019-6-15	crc	unknown		FOLFIRI		2021-06-01	0	0	0	pMMR	MSS	0	1	0	letf-side CRC	1	0	1	9	1	1	0	1	0	24	0	1	0	1	0	0	0	23.9	175	60	2019-6-15	240	4	2019-6-29	240	4	2019-7-15
81	1	2019-10-01 16:13:00 UTC	unknown	1	Female	56	2019-5-1	crc	live+lung	1	FOLFIRI		2020-09-20	1	0	9	pMMR	MSS	1	0	0	right-side CRC	1	0	0	2	1	2	0	0	0	17.2	0	0	0	0	0	0	0	5.1	160	55	2019-5-1	200	4.1	2019-5-19	200	4.1	2019-6-8
82	1	2020-06-18 13:04:00 UTC	SD	1	Male	53	2019-4-8	crc	unknown	0	FOLFIRI		2022-03-18	1	0	9	pMMR	MSS	0	0	1	letf-side CRC	1	0	1	2	1	2	0	0	1	36.8	0	0	0	0	1	1	0	14.6	170	70	2019-4-8	320	4.9	2019-4-28	280	4.9	2019-5-20
83	1	2019/10/18	SD	1	Female	42	2019-4-23	crc	unknown		FOLFIRI		2019-11-17	0	1	1	pMMR	MSS	1	0	0	right-side CRC	1	0	0	3	1	3	0	0	1	6.5	1	0	0	1	0	0	0	6.9	153	42	2019-4-23	200	3.5	2019-5-7	200	3.5	2019-5-23
84	1	2019-06-19 11:13:00 UTC	PD	1	Male	61	2019-4-2	crc	unknown	2	FOLFIRI		2020-08-25	0	0	9	dMMR	MSI-H	0	0	0	letf-side CRC	1	0	0	2	1	1	0	0	0	15.2	0	1	0	0	0	0	0	2.6	175	55	2019-4-2	240	4.2	2019-4-20	240	4.2	2019-5-8
85	9		unknown	1	Female	55	2019-3-25	crc	peritoneum	0	FOLFIRI	2021-11-25		1	0	9	pMMR	MSS	1	0	0	letf-side CRC	1	0	0	9	0	1	0	0	0	32.8	0	0	0	0	0	0	0	32.5	156	55	2019-3-25	200	4.2	2019-4-7	200	4.2	2019-04-21
86	1	2019-06-04 00:00:00 UTC	unknown	1	Male	72	2019-3-25	crc	unknown	1	FOLFIRI		2019-10-24	0	0	9	9	9	0	1	0	letf-side CRC	1	0	0	9	0	3	0	0	2	6.5	0	0	0	0	0	0	0	2.4	170	63	2019-3-25	240	4.2	2019-4-14	240	4.2	2019-5-4
87	1	2019-08-27 00:00:00 UTC	unknown	1	Female	83	2019-2-26	crc	live	4	FOLFIRI		2020-05-27	1	0	9	pMMR	MSS	1	0	0	letf-side CRC	1	0	0	3	1	1	0	2	1	15.7	0	0	0	1	0	0	0	6.1	155	46	2019-2-26	240	3.5	2019-3-14	240	3.5	2019-3-29
88	0		CR	1	Male	69	2019-1-29	crc	unknown		FOLFIRI	2022-03-23		0	0	9	pMMR	MSS	0	1	0	letf-side CRC	1	0	0	3	0	1	0	1	1	38.8	1	1	0	1	0	1	0	38.3	165	66	2019-1-29	200	3.5	2019-2-16	200	3.5	2019-3-4
89	1	2020/4/30	PR	1	Female	53	2019-1-25	crc	unknown	2	FOLFIRI	2022-09-14		1	0	9	pMMR	MSS	1	0	0	letf-side CRC	1	1	0	9	0	1	1	0	0	19.1	0	0	0	1	0	0	0	44.3	165	51	2019-1-25	280	4.25	2019-2-18	280	4.25	2019-3-14
90	1	2021/1/31	PD	1	Male	53	2019-12-12	crc	live	1	FOLFIRI		2020-03-19	1	0	9	pMMR	MSS	1	0	0	letf-side CRC	0	0	0	3	1	1	0	0	0	3.3	0	0	0	0	0	0	0	3.3	168	71	2019-12-12	300	4.5	2019-12-27	300	4.5	2020-1-12
91	1	2020/11/26	PR	1	Male	55	2019-12-12	crc	unknown	5	FOLFIRI	2022-03-25		0	0	0	pMMR	MSS	0	1	1	letf-side CRC	1	0	0	2	1	2	1	0	0	22.9	0	0	0	1	0	0	0	27.8	170	58.6	2019-12-12	280	4.2	2019-12-28	280	4.2	2020-1-14
92	1	2021-01-28 00:00:00 UTC	SD	1	Female	68	2019-11-22	crc	peritoneum	1	FOLFIRI	2022-10-26		0	0	9	pMMR	MSS	0	0	0	right-side CRC	1	0	0	3	0	1	0	1	0	35.8	0	0	0	1	0	0	0	14.4	150	50	2019-11-22	240	4.1	2019-12-10	240	4.1	2019-12-31
93	1	2021/12/10	9	1	Male	55	2019-11-2	crc	lymph	1	FOLFIRI	2022-09-23		1	0	9	pMMR	MSS	0	1	0	letf-side CRC	1	0	0	2	0	3	0	0	0	22.8	0	0	0	0	0	0	0	35.2	165	65	2019-11-2	300	4.5	2019-11-26	300	4.5	2019-12-13
94	1	2020-01-10 15:06:00 UTC	unknown	1	Male	71	2019-11-12	crc	lung+lymph	2	FOLFIRI		2021-04-23	0	0	0	pMMR	MSS	0	1	0	letf-side CRC	1	0	0	2	0	3	0	0	1	17.9	0	0	0	0	0	0	0	2	172	61	2019-11-12	200	4.1	2019-12-12	200	4.1	2019-12-26
95	1	2020-11-03 15:38:00 UTC	PR	1	Male	65	2019-10-21	crc	lung	1	FOLFIRI		2022-03-10	1	0	0	9	9	1	0	0	letf-side CRC	1	0	0	2	0	1	0	0	0	29.2	0	0	0	0	1	1	0	12.6	162	72	2019-10-21	270	4.35	2019-11-4	270	4.35	2019-11-19
96	1	2020-05-01 00:00:00 UTC	PR	1	Male	58	2019-10-18	crc	live	1	FOLFIRI	2019-10-09		0	0	9	9	9	0	1	0	letf-side CRC	0	0	0	2	1	1	0	0	0	0	0	0	0	0	1	0	0	6.5	176	70	2019-10-18	270	4.2	2019-11-7	270	4.2	2019-11-22
97	1	2021-01-07 00:00:00 UTC	PR	1	Male	72	2019-10-14	crc	unknown	1	FOLFIRI	2022-11-01		0	0	9	9	MSI-H	1	0	0	letf-side CRC	1	0	1	2	1	2	0	0	0	37.3	0	0	0	0	0	0	0	15	167	74	2019-10-14	280	4.5	2019-11-2	280	4.5	2019-11-17
98	0		SD	1	Female	66	2018-9-12	crc	bone		FOLFIRI	2022-06-30		0	0	9	9	MSI-L	0	0	0	letf-side CRC	1	0	0	2	0	2	0	0	0	46.6	1	0	0	0	0	0	0	43.1	156	55	2018-9-12	200	3.5	2018-10-1	200	3.5	2018-10-14
99	1	2020-02-28 14:55:00 UTC	PR	1	Male	59	2018-8-21	crc	live+lung	1	FOLFIRI		2021-06-06	0	0	0	pMMR	MSS	0	1	0	letf-side CRC	1	0	0	2	1	2	0	0	1	21.9	0	0	0	0	0	0	0	18.5	170	60	2018-8-21	240	4.35	2019-9-5	240	4.35	2019-9-22
100	1	2019-11-05 15:07:00 UTC	SD	1	Male	55	2018-8-20	crc	live		FOLFIRI		2020-06-15	0	0	9	9	9	0	0	0	right-side CRC	1	1	1	2	1	1	0	0	0	21.8	0	0	0	0	0	0	0	14.7	170	80	2018-8-20	280	4.6	2018-9-3	280	4.6	2018-9-22
101	1	2018-11-18 00:00:00 UTC	SD	1	Male	71	2018-7-4	crc	peritoneum		FOLFIRI		2019-03-09	0	0	9	9	9	0	1	0	letf-side CRC	0	0	0	9	0	2	0	3	0	8.3	0	0	0	0	0	0	0	4.6	160	68	2018-7-4	270	4.2	2018-7-18	270	4.2	2018-7-31
102	1	2020/6/12	SD	1	Male	47	2018-7-3	crc	live	1	FOLFIRI		2020-10-23	1	0	9	pMMR	MSS	1	0	0	letf-side CRC	0	0	0	9	1	3	0	0	0	4.6	0	0	0	1	0	0	0	28.1	168	70	2018-7-3	280	4.5	2018-7-18	280	4.5	2018-8-4
103	0		SD	1	Male	63	2018-6-3	crc	unknown		FOLFIRI		2018-09-27	0	0	9	pMMR	MSS	1	0	0	right-side CRC	1	0	0	2	0	2	0	1	0	4.5	1	0	0	0	1	0	0	4.9	160	58	2018-6-3	300	4.2	2018-6-20	300	4.2	2018-7-6
104	1	2019-08-19 00:00:00 UTC	SD	1	Female	63	2018-6-19	crc	live+peritoneum+pleura		FOLFIRI		2020-06-15	0	0	9	pMMR	MSS	0	1	0	right-side CRC	1	1	0	2	1	5	0	0	2	24.4	0	0	0	1	0	0	0	14.2	150	46	2018-6-19	180	3	2018-7-7	180	3	2018-7-26
105	1	2018/8/16	PD	1	Female	51	2018-6-14	crc	live+peritoneum		FOLFIRI		2021-04-20	0	0	9	pMMR	MSS	0	1	0	letf-side CRC	1	0	0	3	1	1	0	0	0	15.6	0	0	0	1	1	1	0	34.7	155	60	2018-6-14	280	4	2018-7-5	280	4	2018-7-24
106	1	2021/11/30	SD	1	Female	50	2018-6-11	crc	live		FOLFIRI	2018-06-25		9	9	9	9	9	0	0	0	letf-side CRC	1	0	1	2	1	1	0	0	0	0.5	0	0	0	0	0	0	0	0.5	155	59	2018-6-11	180	4.7	2018-6-27	180	4.7	2018-7-12
107	1	2019-08-06 09:17:00 UTC	SD	1	Male	59	2018-6-11	crc	unknown		FOLFIRI	2021-03-24		0	0	9	9	9	0	0	0	letf-side CRC	1	0	0	2	1	2	0	0	0	34.1	0	0	0	0	0	0	0	14	162	70	2018-6-11	200	4.2	2018-6-29	300	4.9	2018-7-16
108	1	2019-02-18 00:00:00 UTC	SD	1	Male	69	2018-5-23	crc	lymph		FOLFIRI		2020-01-17	9	9	9	9	9	0	0	0	letf-side CRC	0	0	0	3	0	1	0	0	0	16.3	0	0	0	0	0	0	0	9	173	62	2018-5-23	240	4.15	2018-6-12	240	4.15	2018-7-2
109	1	2019-06-04 15:51:00 UTC	SD	1	Male	61	2018-5-16	crc	bone+other		FOLFIRI		2020-07-15	0	0	9	9	9	0	1	1	letf-side CRC	1	0	0	2	0	2	1	1	1	22.5	1	1	0	1	0	1	1	12.8	168	55	2018-5-16	240	4	2018-7-19	240	4	2018-8-7
110	1	2018/12/4	PD	1	Female	43	2018-5-14	crc	live+lung	2	FOLFIRI		2020-04-01	1	0	9	pMMR	MSS	0	0	0	letf-side CRC	0	0	0	9	1	1	0	0	0	3.5	0	0	0	0	0	1	0	22.9	160	50	2018-5-14	260	4	2018-6-1	260	4	2018-6-22
111	1	2020/11/6	PR	1	Male	54	2018-5-10	crc	live	1	FOLFIRI	2022-09-08		0	0	9	pMMR	MSS	0	1	0	letf-side CRC	1	0	1	2	1	1	0	0	1	21.8	1	1	0	0	1	0	1	52.7	178	67	2018-5-10	320	5	2018-6-11	320	5	2018-7-5
112	1	2019-09-12 08:33:00 UTC	PR	1	Male	70	2018-4-16	crc	live		FOLFIRI	2022-08-03		9	9	9	9	9	0	0	0	right-side CRC	0	0	1	9	0	1	0	0	0	52.9	0	0	0	0	0	0	0	17.1	170	60	2018-4-16	280	4.2	2018-5-5	280	4.2	2018-5-29
113	1	2019-05-29 08:33:08 UTC	PR	1	Male	65	2018-3-7	crc	live		FOLFIRI	2022-10-25		0	0	2	pMMR	MSS	0	1	0	letf-side CRC	1	0	1	2	1	2	1	3	0	56.9	0	0	0	1	0	0	0	14.9	165	65	2018-3-7	280	4.5	2018-3-21	280	4.5	2018-4-6
114	1	2018/9/14	SD	1	Female	39	2018-3-29	crc	live		FOLFIRI		2019-07-06	1	0	9	pMMR	MSS	0	0	0	right-side CRC	1	0	1	3	1	1	1	0	0	15.6	0	0	0	1	0	0	0	15.5	156	46	2018-3-29	240	3.5	2018-4-14	240	3.5	2018-5-3
115	1	2019-10-02 00:00:00 UTC	PR	1	Female	63	2018-3-17	crc	lung+bone	2	FOLFIRI		2019-12-20	1	0	9	pMMR	MSS	1	0	0	letf-side CRC	0	0	0	9	0	2	0	0	1	14.5	0	1	0	1	0	0	0	18.8	166	60	2018-3-17	280	4.15	2018-4-1	280	4.15	2018-4-17
116	1	2019/2/25	PR	1	Male	55	2018-3-14	crc	live		FOLFIRI		2020-10-08	1	0	9	pMMR	MSS	1	0	0	letf-side CRC	0	0	0	2	1	3	0	1	0	31.8	0	0	0	1	0	0	0	31.3	174	83	2018-3-14	360	4.9	2018-3-29	360	4.9	2018-4-16
117	9		unknown	1	Male	66	2018-2-8	crc	unknown		FOLFIRI		2018-06-15	1	0	9	pMMR	MSS	1	0	0	letf-side CRC	1	0	0	2	0	2	0	0	0	4.4	0	0	0	0	0	0	0	4.2	170	48.5	2018-2-8	280	4.4	2018-2-26	280	4.4	2018-3-12
118	1	2019/3/1	SD	1	Male	49	2018-2-7	crc	lung		FOLFIRI	2022-09-09		1	0	9	pMMR	MSS	1	0	1	letf-side CRC	1	0	0	2	0	1	1	1	0	46.4	1	0	0	0	0	0	0	55.8	167	78	2018-2-7	280	4	2018-02-23	280	4	2018-03-11
119	1	2019-04-18 13:42:00 UTC	PR	1	Male	65	2018-2-18	crc	live+lung+lymph	2	FOLFIRI		2022-01-15	0	0	0	pMMR	MSS	1	0	0	letf-side CRC	1	1	0	2	1	4	0	0	0	40.6	0	1	0	0	0	0	0	14.1	165	60	2018-2-18	240	4.3	2018-3-14	240	4.3	2018-3-28
120	1	2019/3/22	SD	1	Male	54	2018-12-25	crc	peritoneum		FOLFIRI		2020-02-18	1	0	9	pMMR	MSS	1	0	0	right-side CRC	1	0	0	3	0	2	0	0	0	25.7	0	0	0	0	1	1	0	14	175	72	2018-12-25	280	4.9	2019-1-12	280	4.9	2019-1-27
121	1	2020/8/22	PR	1	Male	54	2018-11-30	crc	live		FOLFIRI	2022-07-14		0	0	0	pMMR	MSS	0	1	0	letf-side CRC	1	0	1	2	1	1	0	0	0	44.6	0	1	0	0	0	0	0	44.1	168	64	2018-11-30	320	5	2018-12-17	320	5	2019-1-6
122	9		unknown	1	Male	58	2018-11-23	crc	unknown	0	FOLFIRI	2022-03-28		0	0	9	dMMR	MSI-H	0	1	0	letf-side CRC	1	0	0	3	0	1	0	0	0	40.9	0	0	0	0	0	0	0	40.7	160	64	2018-11-23	200	4.35	2018-12-9	200	4.35	2018-12-23
123	1	2019/5/23	SD	1	Male	61	2018-11-22	crc	live		FOLFIRI		2020-01-14	0	0	9	pMMR	MSS	0	1	0	letf-side CRC	0	0	0	9	1	2	0	1	0	14.2	0	1	0	1	0	0	0	13.9	170	70	2018-11-22	300	4.7	2018-12-8	300	4.7	2018-12-23
124	1	2019-11-22 00:00:00 UTC	PR	1	Male	55	2017-9-1	crc	live		FOLFIRI	2022-10-14		0	0	9	pMMR	MSS	0	1	0	letf-side CRC	1	0	0	2	1	1	0	1	0	62.5	0	0	0	0	0	0	0	27.1	170	60	2017-9-1	270	4.2	2017-9-17	270	4.2	2017-10-1
125	1	2018/4/17	SD	1	Female	61	2017-8-5	crc	lung		FOLFIRI		2020-12-19	1	0	9	pMMR	MSS	0	0	0	letf-side CRC	1	0	0	3	0	1	1	1	0	39.3	1	1	0	1	0	0	0	41.1	165	70	2017-8-5	280	4.5	2017-9-8	280	4.5	2017-9-28
126	9		unknown	1	Female	64	2017-8-30	crc	live		FOLFIRI		2018-04-16	0	0	9	pMMR	MSS	0	1	0	letf-side CRC	0	0	0	9	1	2	0	0	1	8.1	0	0	0	1	0	0	0	7.6	165	75	2017-8-30	300	4.5	2017-9-17	300	4.5	2017-10-02
127	1	2018/12/17	PR	1	Male	54	2017-6-8	crc	unknown		FOLFIRI	2022-03-28		1	0	9	dmmr	MSI-H	0	0	0	letf-side CRC	1	0	0	2	1	2	0	0	0	59	0	0	0	0	1	1	1	58.5	170	62	2017-6-8	300	4.5	2017-06-23	300	4.5	2017-07-08
128	1	2018/9/28	PR	1	Female	62	2017-6-6	crc	lung		FOLFIRI		2020-11-16	0	0	0	pMMR	MSS	0	1	1	letf-side CRC	1	0	1	9	1	2	0	1	0	42.9	0	0	0	1	0	0	0	42	157	49	2017-6-6	270	4.2	2017-6-22	270	4.2	2017-7-7
129	1	2018-03-08 00:00:00 UTC	unknown	1	Male	67	2017-6-28	crc	live		FOLFIRI		2018-08-25	9	0	9	pMMR	MSS	0	0	0	letf-side CRC	0	0	0	9	1	3	0	0	1	13.5	0	0	0	0	0	0	0	8.4	168	65	2017-6-28	280	4	2017-7-18	280	4	2017-8-8
130	1	2018-03-05 08:48:36 UTC	SD	1	Female	62	2017-5-16	crc	lung+bone		FOLFIRI		2019-10-30	9	9	9	9	9	0	0	1	letf-side CRC	1	0	0	3	0	2	0	0	0	26	0	1	0	0	0	0	0	9.8	154	53	2017-5-16	280	4.2	2017-6-5	280	4.2	2017-6-28
131	1	2018/5/1	PR	1	Male	55	2017-2-15	crc	live		FOLFIRI		2022-02-28	1	0	9	pMMR	MSS	0	0	1	letf-side CRC	0	0	0	9	1	1	0	0	0	61.5	0	0	0	0	0	0	0	61.3	169	73	2017-2-15	280	4.2	2017-03-01	280	4.2	2017-03-15
132	1	2018-01-12 08:44:24 UTC	unknown	1	Male	34	2017-12-5	crc	unknown		FOLFIRI		2019-06-23	9	9	9	9	9	0	0	0	letf-side CRC	1	0	0	3	0	1	0	0	0	19	0	0	0	1	0	0	0	1.3	167	65	2017-12-5	250	4.2	2017-12-24	250	4.2	2018-01-07
133	1	2018-03-29 00:00:00 UTC	PR	1	Male	39	2017-10-17	crc	live		FOLFIRI		2018-05-12	0	0	9	pMMR	MSS	0	1	0	letf-side CRC	0	0	0	9	1	2	0	0	0	7.1	0	0	0	0	1	1	0	5.4	162	55	2017-10-17	280	4.2	2017-11-7	280	4.2	2017-11-23
134	1	2018/4/15	PR	1	Male	71	2016-10-19	crc	live		FOLFIRI		2019-06-15	0	0	9	pMMR	MSS	0	1	0	letf-side CRC	1	0	1	2	1	1	1	0	0	28.6	0	1	0	0	0	1	0	32.3	160	62	2016-10-19	280	4.5	2016-11-5	280	4.5	2016-11-19
135	0		unknown	1	Male	67	2015-5-1	crc	live+lung		FOLFIRI		2018-09-18	1	0	9	pMMR	MSS	1	0	0	right-side CRC	1	0	0	2	0	1	0	0	0	0.6	0	0	0	1	0	0	0	41.2	168	68	2015-5-1	300	4.25	2015-5-15	300	4.25	2015-5-29
136	1	2022-05-06	unknown	1	Male	76	2020-12-16	crc		3	FOLFIRI			0	0	9	pMMR	MSS	1	0	0	letf-side CRC	1	0	0	9	0	1	0	0	2	25	1	1	1	1	0	1	0	16.5	169	55	2020-12-16	300	4.625	2021-01-08	240	4	2021-03-23
137	0		PR	1	Male	61	2020-12-04	crc		2	FOLFIRI			1	0	0	pMMR	MSS	1	0	0	right-side CRC	1	0	0	9	0	1	0	2	1	7.5	0	1	1	1	1	1	0	7.5	160	55	2020-12-04	270	4.125	2020-12-25	270	4.125	2021-01-20
138	0		SD	1	Female	74	2020-10-26	crc		4	FOLFIRI			1	0	9	pMMR	MSS	1	0	0	letf-side CRC	1	0	0	3	0	1	0	2	2	5.8	0	1	1	1	0	0	0	5.8	156	40.5	2020-10-26	200	3.5	2020-11-14	200	3.5	2020-12-03
139	1	2021-04-10	SD	1	Female	58	2020-07-25	crc		3	FOLFIRI			1	0	0	pMMR	MSS	1	0	0	right-side CRC	1	0	0	9	0	2	0	0	0	25	0	1	1	1	1	1	1	8.5	158	46	2020-07-25	280	4.425	2020-08-13	280	4.425	2020-08-28
140	0		PR	1	Male	46	2020-06-02	crc		1	FOLFIRI			1	0	9	pMMR	MSS	1	0	0	letf-side CRC	1	0	0	2	1	2	0	0	0	7	0	1	0	1	1	1	0	7	185	81	2020-06-02	360	5.25	2020-07-01	360	5.25	2020-07-16
141	1	2021-01-01	PR	1	Male	75	2020-05-20	crc		1	FOLFIRI			0	0	1	pMMR	MSS	1	0	0	letf-side CRC	1	0	1	2	1	2	0	1	0	17	0	1	1	0	1	1	0	7.5	174	80	2020-05-20	280	4.7	2020-06-05	280	4.7	2020-06-20
142	0		PR	1	Male	69	2020-04-17	crc		1	FOLFIRI			1	0	0	pMMR	MSS	0	0	1	letf-side CRC	1	0	1	2	1	2	0	0	1	6	0	1	1	1	1	1	0	6	170	69	2020-04-17	280	4.95	2020-05-04	280	4.95	2020-05-28
143	0		SD	1	Male	47	2019-08-21	crc		2	FOLFIRI			0	0	9	pMMR	MSS	1	0	0	letf-side CRC	1	0	0	3	1	2	0	0	0	3.1	0	0	1	0	1	0	0	3.1	170	61.75	2019-08-21	250	4.45	2019-09-11	260	4.45	2019-09-28
144	1	2019-09-15	PR	1	Female	28	2018-12-18	crc		4	FOLFIRI			0	0	9	pMMR	MSS	0	1	1	letf-side CRC	0	0	0	9	1	2	0	0	0	25.3	0	1	1	1	0	0	0	9	163	48	2018-12-18	240	4.1	2019-01-04	280	4.1	2019-01-22
[truncated: 37 more columns]
